# Supplementary material for: Female Employment Reduces Fertility in Rural Senegal
Source: PLOS journal article supplement (doi:10.1371/journal.pone.0122086), 2015-03-27
Supplement: S7 (10.1371/journal.pone.0122086.s007) [file journal.pone.0122086.s007]

**Table S 4. Balancing properties of variables in treated and control groups for kernel matching on propensity scores. Source: own estimations from survey data.**

|                                      |           | Mean<br>treated<br>units | Mean<br>control<br>units | % Bias<br>between treated<br>and controls | %<br>Reduction<br>in bias | t-test:<br>Mean(control)=<br>Mean(treatment) |
|--------------------------------------|-----------|--------------------------|--------------------------|-------------------------------------------|---------------------------|----------------------------------------------|
| Age                                  | Unmatched | 20.57                    | 18.39                    |                                           | 34.3                      | 4.15***                                      |
|                                      | Matched   | 20.46                    | 20.36                    |                                           | 1.6                       | 0.15                                         |
| Single                               | Unmatched | 0.69                     | 0.68                     |                                           | 2.0                       | 0.24                                         |
|                                      | Matched   | 0.68                     | 0.67                     |                                           | 2.5                       | 0.23                                         |
| Literacy                             | Unmatched | 0.53                     | 0.43                     |                                           | 20.1                      | 2.47**                                       |
|                                      | Matched   | 0.53                     | 0.52                     |                                           | 2.6                       | 0.24                                         |
| Ethnicity<br>(1=Pular)               | Unmatched | 0.32                     | 0.38                     |                                           | -12.2                     | -1.48                                        |
|                                      | Matched   | 0.32                     | 0.32                     |                                           | -0.5                      | -0.05                                        |
| Ethnicity<br>(1=Wolof)               | Unmatched | 0.49                     | 0.49                     |                                           | 1.1                       | 0.13                                         |
|                                      | Matched   | 0.50                     | 0.49                     |                                           | 1.9                       | 0.18                                         |
| Religion<br>(1=christian)            | Unmatched | 0.04                     | 0.03                     |                                           | 5.3                       | 0.68                                         |
|                                      | Matched   | 0.04                     | 0.04                     |                                           | -0.3                      | -0.03                                        |
| Land owned (ha)                      | Unmatched | 1.89                     | 2.83                     |                                           | -15.9                     | -1.75*                                       |
|                                      | Matched   | 1.88                     | 1.91                     |                                           | -0.5                      | -0.06                                        |
| Distance to<br>concrete road<br>(km) | Unmatched | 1.43                     | 2.55                     |                                           | -38.2                     | -4.39***                                     |
|                                      | Matched   | 1.45                     | 1.49                     |                                           | -1.6                      | -0.18                                        |

Balancing properties are tested so that pretreatment characteristics of treated and control units do not differ significantly after matching. Significant differences are indicated with \*  $p < 0.1$ , \*\*  $p < 0.05$  or \*\*\*  $p < 0.01$ .
